# Supplementary material
Source: publisher figshare collection journal article supplement (https://tandf.figshare.com/ndownloader/files/14133560)
Supplement: Supplementary file 1 [file 14133560]

**APPENDICES: Summary of ANOVA Tables**

**Table A1:** Summary ANOVA tables for 3-way off-axis force repeated measures ANOVAs (n=4). Cells in green indicate a significant interaction or main effect (p<0.05). Cells in yellow indicate an omega-squared value above 0.01. Interactions and main effects that met both the p-value and omega-squared criterion were considered significant.

**Table A2:** Summary ANOVA tables for 2-way joint moment repeated measures ANOVAs for the **pull** direction (n=7). Cells in green indicate a significant interaction or main effect (p<0.05). Cells in yellow indicate an omega-squared value above 0.01. Interactions and main effects that met both the p-value and omega-squared criterion were considered significant.

**Table A3:** Summary ANOVA tables for 2-way joint moment repeated measures ANOVAs for the **push** direction (n=7). Cells in green indicate a significant interaction or main effect (p<0.05). Cells in yellow indicate an omega-squared value above 0.01. Interactions and main effects that met both the p-value and omega-squared criterion were considered significant.
